# Supplementary material for: Continuous On-Chip Cell Washing Using Viscoelastic Microfluidics
Source: MDPI journal article supplement (doi:10.3390/mi14091658), 2023-08-25
Supplement: s1 [file s1]

Supplementary Materials

# Continuous on-Chip Cell Washing Using Viscoelastic Microfluidics

Hyunjung Lim <sup>1,†</sup>, Minji Kim <sup>2,†</sup>, Yeongmu Kim <sup>3</sup>, Seunghee Choo <sup>4</sup>, Tae Eun Kim <sup>3</sup>, Jaesung Han <sup>5</sup>,  
Byoung Joe Han <sup>6</sup>, Chae Seung Lim <sup>7,\*</sup> and Jeonghun Nam <sup>3,6,\*</sup>

<sup>1</sup> Interdisciplinary Program in Precision Public Health (PPH), Korea University, Seoul 02841, Republic of Korea; hyunjunglim.email@gmail.com

<sup>2</sup> Department of AI Electrical and Electronic Engineering, Incheon Jaeneung University, Incheon 22573, Republic of Korea; minjizzang73@gmail.com

<sup>3</sup> Artificial Intelligence(AI)-Bio Research Center, Incheon Jaeneung University, Incheon 21987, Republic of Korea

<sup>4</sup> College of Life Sciences and Bio Engineering, Incheon National University, Incheon 22012, Republic of Korea

<sup>5</sup> Department of Mechanical and control technologies, Seoul Cyber University, Seoul 01133, Republic of Korea

<sup>6</sup> Department of Digital Biotech, Incheon Jaeneung University, 22573, Incheon, Republic of Korea

<sup>7</sup> Department of Laboratory Medicine, College of Medicine, Korea University, Seoul 08307, Republic of Korea

\* Correspondence: malarim@korea.ac.kr (C.S.L.); jhnam77@gmail.com (J.N.); Tel.: +82-2-2626-1514 (C.S.L.); +82-32-890-7515 (J.N.).

† These authors contributed equally to this work.

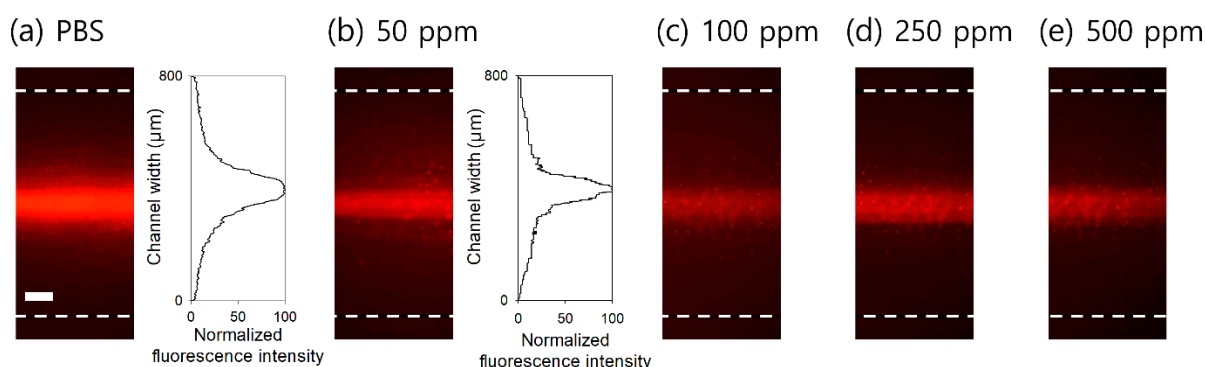

**Figure S1.** Flow distribution of 500 nm particles in (a) PBS and XG solutions at various concentrations of (b) 50 ppm, (c) 100 ppm, (d) 250 ppm, and (e) 500ppm, respectively. White dotted lines show the channel walls and the X and Y axes indicate the normalized number of particles of 0-100 and the width of the expansion region of 0-800 μm. The scale bar is 100 μm.
